# Supplementary material for: Factors Associated with Nursing Students' Intention to Leave the Nursing Profession during their Final Clinical Practicum: A Cross-Sectional Study
Source: Research Square preprint supplement (doi:10.21203/rs.3.rs-8302958/v1), 2026-01-30
Supplement: Supplementary file 1 [file e806e3c0783bb3066bb0e5e8.docx]

***Appendix A. Levels of ease of transition for nursing students***

***Instructions: Please indicate how much you agree or disagree with each statement based on your own experience. There are no right or wrong answers. 1 = Strongly disagree, 2 = Disagree, 3 = Neutral, 4 = Agree, 5 = Strongly agree***

| I feel that it will be an easy transition from being a nursing student to being a professional nurse. | 1 | 2 | 3 | 4 | 5 |
| --- | --- | --- | --- | --- | --- |

***Appendix B. Levels of Intention to leave the nursing profession for nursing students***

***Instructions: Please indicate how much you agree or disagree with each statement based on your own experience. There are no right or wrong answers. There is no right or wrong answer. 1 = Strongly disagree, 2 = Disagree, 3 = Agree, 4= Strongly agree***

| I have the intention to leave the nursing profession. | 1 | 2 | 3 | 4 |
| --- | --- | --- | --- | --- |
